# Supplementary material for: Therapeutic Effects of Perilla Phenols in Oral Squamous Cell Carcinoma
Source: MDPI journal article supplement (doi:10.3390/ijms241914931), 2023-10-05
Supplement: s1 [file s1]

# Supplementary Data

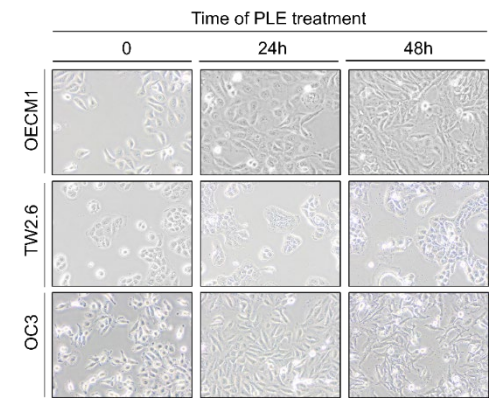

**Figure S1.** Sensitivity of OSCC to PLE assessed by cell morphology. The representative images of OSCC cell lines before and after 4 mg/mL PLE treatment were taken at indicated times by Olympus CKX53 inverted microscope.

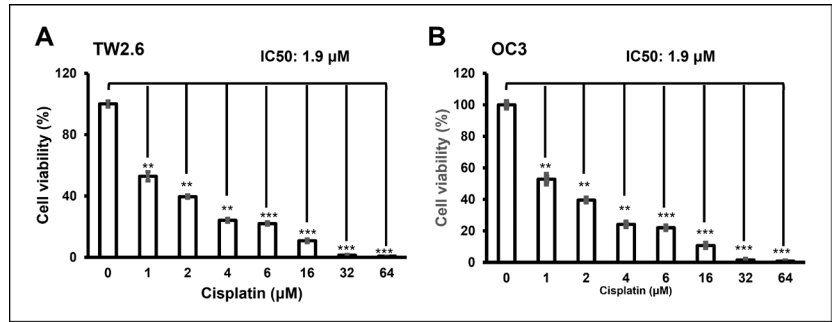

**Figure S2.** IC<sub>50</sub> of cisplatin for TW2.6 and OC3 cells. Cell viability was determined by MTT assay. Data are presented as mean  $\pm$  SEM of at least three independent experiments (\*\* $p < 0.01$ , \*\*\* $p < 0.005$ )

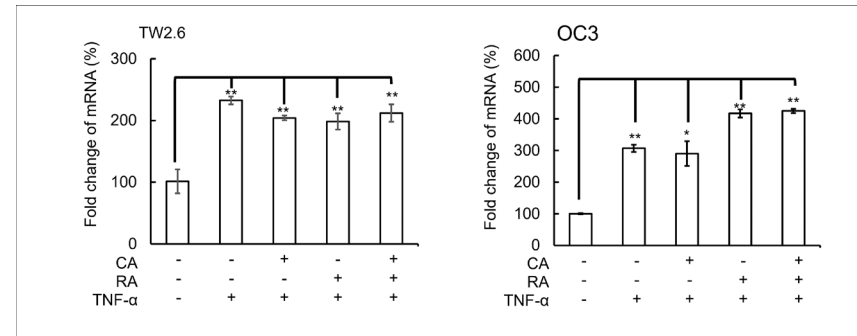

**Figure S3.** Effect of CA and RA on the expression of IL-1b mRNA. The levels of IL-1b expression were determined by quantitative PCR with TW2.6 and OC3 cells under the conditions as described in Figure 4b. Data are presented as mean  $\pm$  SEM of three independent experiments (\* $p < 0.05$ , \*\* $p < 0.01$ ).
